# Supplementary material for: Removal of acid red 88 by a magnetic graphene oxide/cationic hydrogel nanocomposite from aqueous solutions: adsorption behavior and mechanism
Source: Royal Society of Chemistry journal article supplement (doi:10.1039/c6ra08507e), 2016-01-01
Supplement: c6ra08507e1.pdf [file c6ra08507e1.pdf]

## **Supplementary Materials**

**for**

**Removal of acid red 88 by synthesized magnetic graphene  
oxide/cationic hydrogel nanocomposites from aqueous solutions:**

**Adsorption behavior and mechanism**

**This file contains:**

**2 figure (Fig. S1-3)**

**3 table (Table. S1-3)**

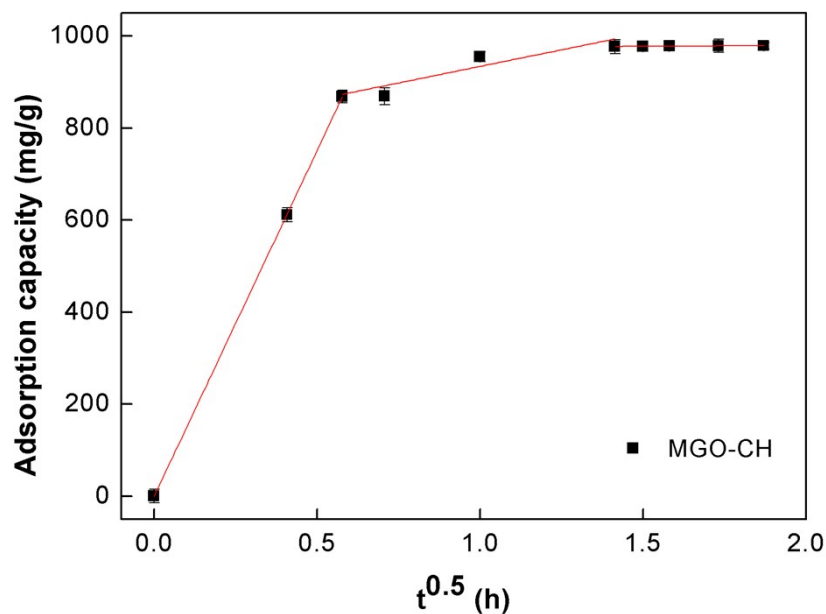

**Fig. S1** Effect of contact time on AR88 adsorption onto MGO-CH at 500 mg/L initial concentration and fitting with the Weber-Morris intraparticle model (Weber and Morris 1963).

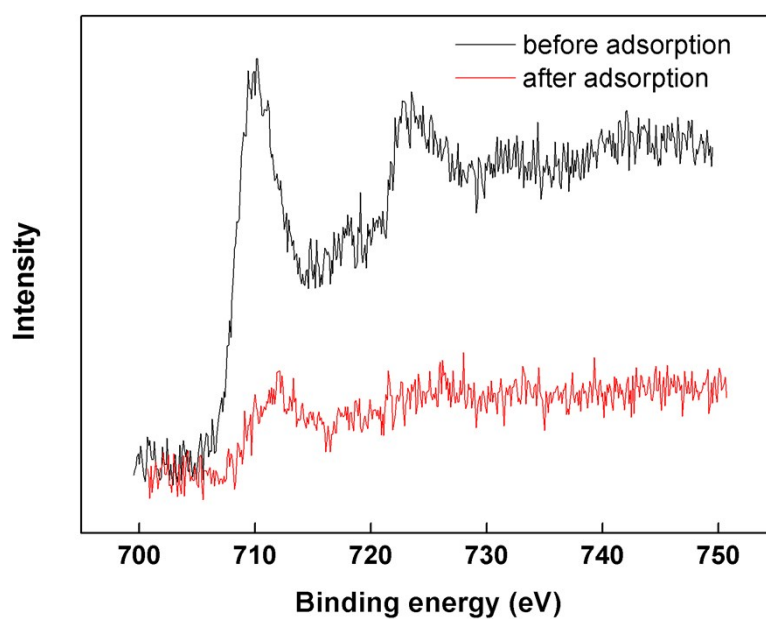

**Fig. S2** XPS of Fe 2p before and after AR88 adsorption

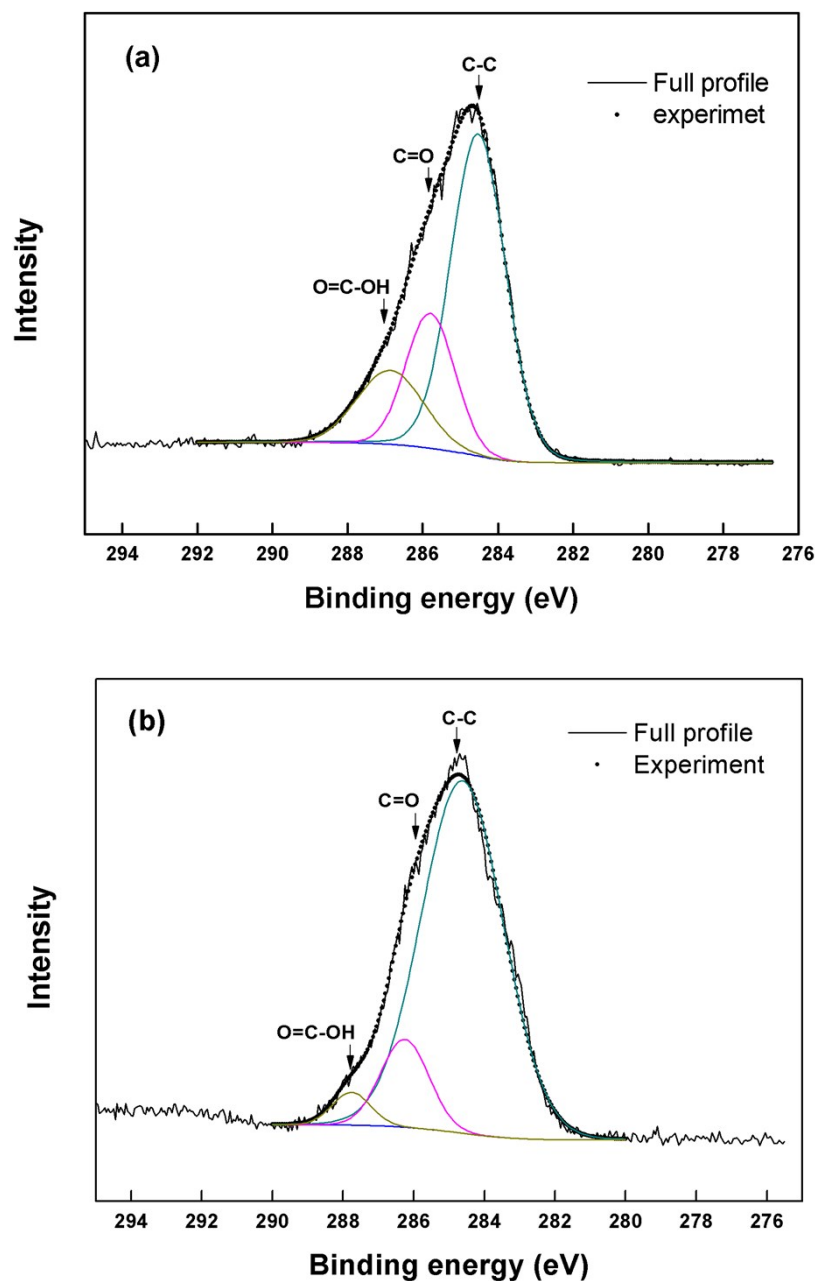

**Fig. S3** XPS spectra of C 1s for the MGO-CH adsorbent before (a) and after (b) AR88 adsorption

**Table S1.** The intraparticle diffusion coefficients for 500 mg/L AC88 adsorption on the MGO-CH

| Initial concentration (mg/L) | $k_{p1}$ (mg/g·h <sup>0.5</sup> ) * | $R_1^2$ | $k_{p2}$ (mg/g·h <sup>0.5</sup> ) * | $R_2^2$ | $k_{p3}$ (mg/g·h <sup>0.5</sup> ) * | $R_3^2$ |
|------------------------------|-------------------------------------|---------|-------------------------------------|---------|-------------------------------------|---------|
| 500                          | 1503.4                              | 0.999   | 144.1                               | 0.882   | 0.46                                | 0.869   |

\*These values were determined using the Weber-Morris intraparticle model, equation (3).

**Table S2.** The deconvolution of XPS N 1s spectra for the MGO-CH sample before and after AC88 adsorption from a 500 mg/L aqueous solution.

| Parameters        | Species             | B.E. <sup>a</sup><br>(eV) | FWHM <sup>b</sup><br>(eV) | G:L <sup>c</sup> ratio | Percent <sup>d</sup><br>(%) |
|-------------------|---------------------|---------------------------|---------------------------|------------------------|-----------------------------|
| Before adsorption | pyrrole-like        | 399.7                     | 1.81                      | 15:85                  | 51.3                        |
|                   | quaternary nitrogen | 402.5                     | 2.18                      | 15:85                  | 48.7                        |
| After adsorption  | pyridine-like       | 398.1                     | 1.03                      | 15:85                  | 6.9                         |
|                   | pyrrole-like        | 399.7                     | 3.29                      | 15:85                  | 68.3                        |
|                   | quaternary nitrogen | 402.5                     | 1.43                      | 15:85                  | 24.8                        |

<sup>a</sup>Binding energy (B.E.); <sup>b</sup>The full width at half maximum (FWHM); <sup>c</sup>Gaussian:Lorentzian ratio; <sup>d</sup>The percentage represents the contribution of each peak to the total number of counts under the N 1s peak.

**Table S3. The deconvolution of XPS C 1s spectra for the MGO-CH sample before and after AC88 adsorption from a 500 mg/L aqueous solution.**

| Parameters        | Species                         | B.E. <sup>a</sup><br>(eV) | FWHM <sup>b</sup><br>(eV) | G:L <sup>c</sup> ratio | Percent <sup>d</sup><br>(%) |
|-------------------|---------------------------------|---------------------------|---------------------------|------------------------|-----------------------------|
| Before adsorption | C-C bonds in nonoxygenated ring | 284.6                     | 1.72                      | 10:90                  | 62                          |
|                   | C-O bonds in hydroxyl and epoxy | 286.1                     | 1.59                      | 10:90                  | 26.2                        |
|                   | C=O bonds in carbonyl           | 287.0                     | 1.85                      | 10:90                  | 11.8                        |
| After adsorption  | C-C bonds in nonoxygenated ring | 284.6                     | 2.73                      | 10:90                  | 82.4                        |
|                   | C-O bonds in hydroxyl and epoxy | 286.2                     | 1.64                      | 10:90                  | 13.6                        |
|                   | C=O bonds in carbonyl           | 287.7                     | 1.38                      | 10:90                  | 4.0                         |

<sup>a</sup>Binding energy (B.E.); <sup>b</sup>The full width at half maximum (FWHM); <sup>c</sup>Gaussian:Lorentzian ratio; <sup>d</sup>The percentage represents the contribution of each peak to the total number of counts under the C 1s peak.
